# Supplementary material for: PKCη promotes a proliferation to differentiation switch in keratinocytes via upregulation of p27Kip1 mRNA through suppression of JNK/c-Jun signaling under stress conditions
Source: PubMed Central journal article supplement — Cell Death Dis. 2011 May 19;2(5):e157–. doi: 10.1038/cddis.2011.40 (PMC3122119; doi:10.1038/cddis.2011.40), 2011-05-19
Supplement: cddis201140x4.pdf [file cddis201140x4.pdf]

# Hara T et al., Supplemental table S1

## Sequence of primers

|       | Forward sequence                             | Reverse sequence                             |
|-------|----------------------------------------------|----------------------------------------------|
| p27   | 5'-GCG CCG AGA CCA ATG GAG CTC CTC CTC TG-3' | 5'-AAC ACC CCA AAA GCA CGA GCC CCC CTC CT-3' |
| p21   | 5'-TTG CAC TCT GGT GTC TGA GC-3'             | 5'-GTG GGC ACT TCA GGG TTT TC-3'             |
| p57   | 5'-GCC AGG AGC TGA AGG ACC AGC CTC TCT-3'    | 5'-TTC TCC TGC GCA GTT CTC TTG CGC TTG G-3'  |
| p15   | 5'-GCA GAT CCC AAC GCC CTG AAC CGC TTC G-3'  | 5'-CAG GGT CGG CGC AGT TGG GTT CTG CTC-3'    |
| p16   | 5'-TCG CCC AAC GCC CCG AAC TCT TTC GGT-3'    | 5'-GGG AGA AGG TAG TGG GGT CCT CGC AG-3'     |
| p18   | 5'-CAA AAT GGA TTT GGG AGA ACT GCG CTG CA-3' | 5'-CCT GCT CTG GCA GCA TCA TGA ATG ACA G-3'  |
| p19   | 5'-TAG AGA GGA TCT TGA GAA GAG GGC CGC A-3'  | 5'-GGG AGA AGG TAG TGG GGT CCT CGC AG-3'     |
| IL1a  | 5'-GAC CTA AAG AAC TGT TAC AGT G-3'          | 5'-GAA GTG AGC CAT AGC TTG CAT-3'            |
| IL1b  | 5'-TGA AAG CTC TCC ACC TCA ATG GAC AG-3'     | 5'-GCC ACA GGT ATT TTG TCG TTG CTT GGT TC-3' |
| IL6   | 5'-CAA CGA TGA TGC ACT TGC AG-3'             | 5'-CCA GAG GAA ATT TTC AAT AGG C-3'          |
| GMCSF | 5'-GGC AAT TTC ACC AAA CTC AAG G-3'          | 5'-GCT GTC TAT GAA ATC CGC ATA GG-3'         |
| Myc   | 5'-CTT CTC TCC TTC CTC GGA CTC-3'            | 5'-GAC ACC ACA TCA ATT TCT TCC TC-3'         |
| DNp63 | 5'-CCT GGA AAA CAA TGC CCA GAC TCA A-3'      | 5'-TCA CGC TAT TCT GTG CGT GGT CTG T-3'      |
| Mad1  | 5'-CCA AGA AGA ACA GCA CCA GTA GCA GAT-3'    | 5'-AGA GTG GTG TGT CGG CTT GAC TCA GG-3'     |
| Hes1  | 5'-ATG ACT GTG AAG CAC CTC CGG AAC CTG-3'    | 5'-AGG AAG CGG GTC ACC TCG TTC ATG CAC T-3'  |
| Tgfa  | 5'-TGG CTG TCC TCA TTA TCA CCT G-3'          | 5'-AGC AAG CAG TCC TTC CCT TCA G-3'          |
| Hbfg  | 5'-CCA CTG AGG AGG ACC TGA GCT ATA-3'        | 5'-AGA CGT TTT CAT GGC TGC TGG-3'            |
| Kgf-1 | 5'-AGA ACA GCT ACA ACA TCA TGG-3'            | 5'-TCT TTG CAT AGA GTT TCC CTT C-3'          |
| Kgf-2 | 5'-CAG TGT CCT GGA GAT AAC ATC-3'            | 5'-CTC TTT TGA GCC ATA GAG TTT C-3'          |
| Gapdh | 5'-CAA GAG AGG CCC TAT CCC AAC T-3'          | 5'-GTG CAG CGA ACT TTA TTG ATG G-3'          |
