# Supplementary figures and images for: PKCη promotes a proliferation to differentiation switch in keratinocytes via upregulation of p27Kip1 mRNA through suppression of JNK/c-Jun signaling under stress conditions
Source: PubMed Central journal article supplement — Cell Death Dis. 2011 May 19;2(5):e157–. doi: 10.1038/cddis.2011.40 (PMC3122119; doi:10.1038/cddis.2011.40), 2011-05-19

# Hara T et al., Supplemental figure S1

Levels of mRNAs in 3D coculture on day 2.

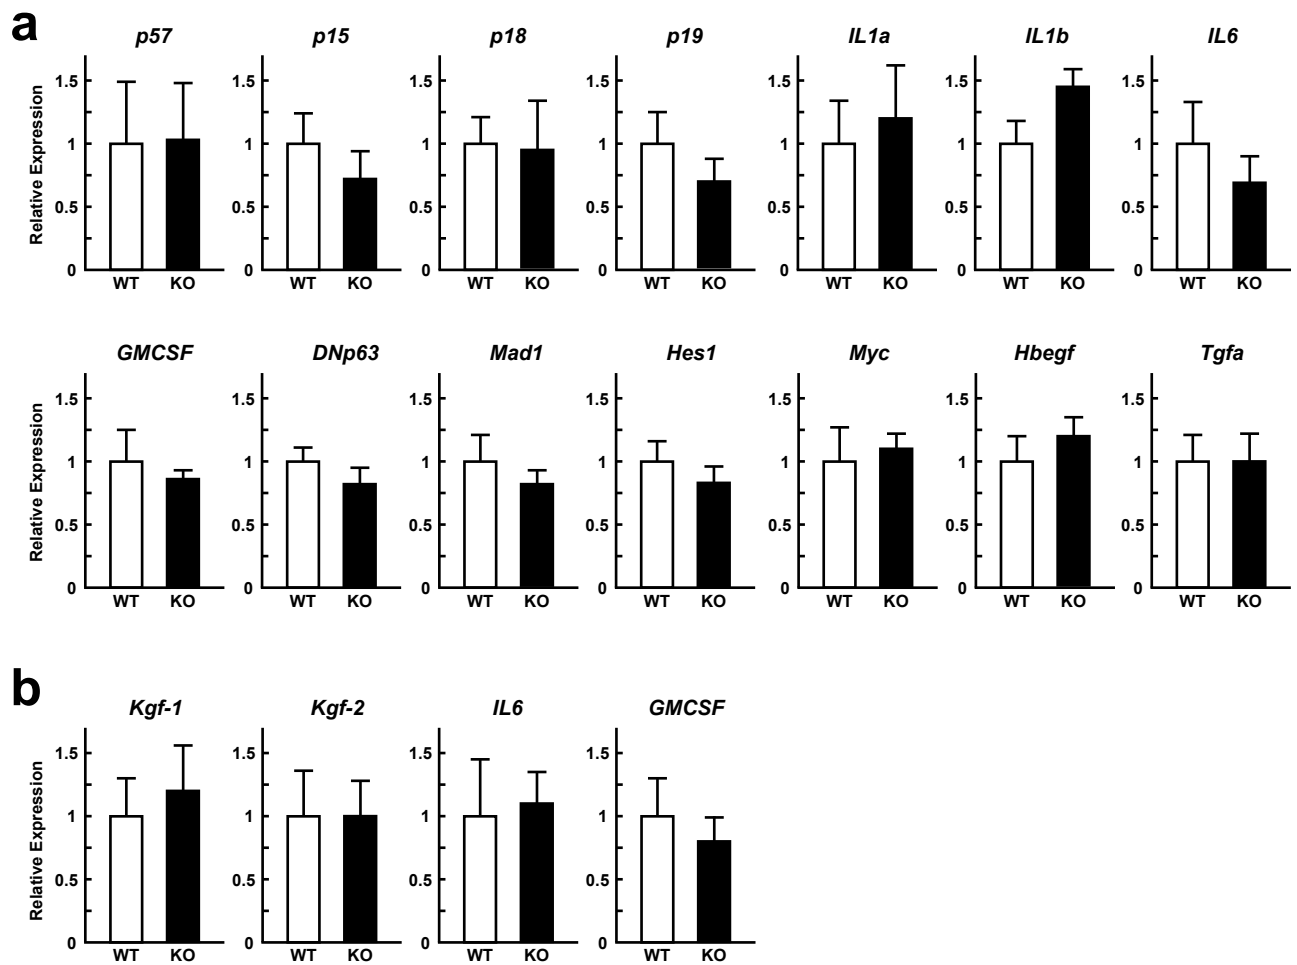

Supplement: cddis201140x1.pdf [file cddis201140x1.pdf]

## Hara T et al., Supplemental figure S2

Levels of proteins in keratinocytes of 3D coculture on day 2.

**a**

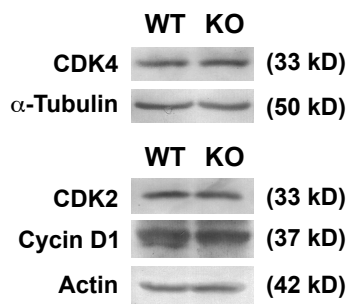

**b**

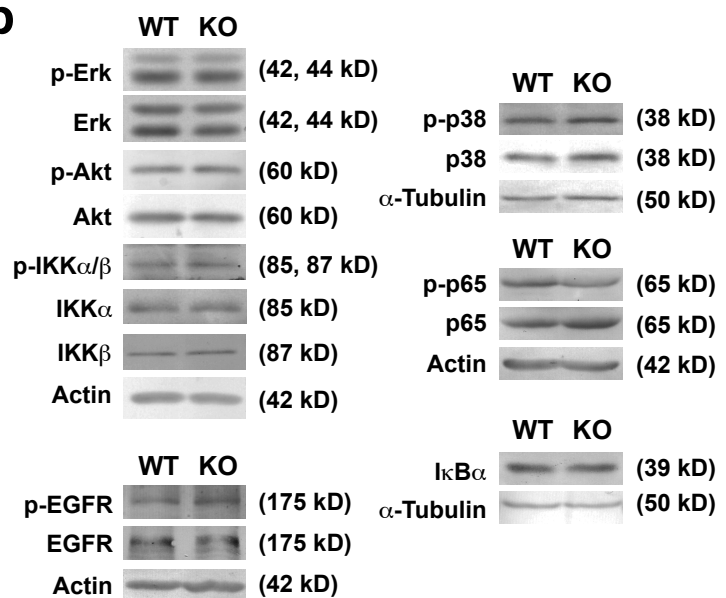

Supplement: cddis201140x2.pdf [file cddis201140x2.pdf]
